# Supplementary material for: Molecular assessment of bacterial vaginosis by Lactobacillus abundance and species diversity
Source: BMC Infect Dis. 2016 Apr 23;16:180. doi: 10.1186/s12879-016-1513-3 (PMC4841971; doi:10.1186/s12879-016-1513-3)
Supplement: Additional file 1: — Vaginal sample information and nucleotide-based microarray data (signal to background ratios of fluorescence intensity for each probe). (XLSX 27 kb) [file 12879_2016_1513_MOESM1_ESM.xlsx]

## Sheet: microarray data
BV-/BV+			BV+	BV+	BV-	BV-	BV-	BV-	BV-	BV-	BV-	BV-	BV-	BV-	BV-	BV-	BV-	BV-	BV-	BV-	BV-	BV-	BV+	BV-	BV+	BV+	BV+	BV+	BV+	BV+	BV+	BV+	BV+	BV+	BV+	BV+	BV+	BV+	BV+	BV+	BV+
Sample number IS-pro			GGD 064	GGD 008	GGD 039	GGD 017	GGD 079	GGD 015	GGD 009	GGD 020	GGD 083	GGD 005	GGD 038	GGD 018	GGD 045	GGD 012	GGD 011	GGD 010	GGD 001	GGD 058	GGD 016	GGD 048	GGD 073	GGD 069	GGD 092	GGD 004	GGD 086	GGD 089	GGD 056	GGD 043	GGD 033	GGD 040	GGD 014	GGD 080	GGD 042	GGD 081	GGD 022	GGD 060	GGD 037	GGD 098	GGD 044
sample ID			GGDBV-064	GGDBV-008	GGDBV-039	GGDBV-017	GGDBV-079	GGDBV-015	GGDBV-009	GGDBV-020	GGDBV-083	GGDBV-005	GGDBV-038	GGDBV-018	GGDBV-045	GGDBV-012	GGDBV-011	GGDBV-010	GGDBV-001	GGDBV-058	GGDBV-016	GGDBV-048	GGDBV-073	GGDBV-069	GGDBV-092	GGDBV-004	GGDBV-086	GGDBV-089	GGDBV-056	GGDBV-043	GGDBV-033	GGDBV-040	GGDBV-014	GGDBV-080	GGDBV-042	GGDBV-081	GGDBV-022	GGDBV-060	GGDBV-037	GGDBV-098	GGDBV-044
Nugent score			8	3	1	0	2	0	1	0	1	0	1	0	3	0	0	0	2	2	0	8	1	9	9	9	10	10	10	10	10	10	10	8	8	9	9	8	9	9	8
Sequence cluster			I	I	I	I	I	I	I	II	II	II	II	II	II	II	II	II	II	II	II	III	III	III	III	III	III	IV	IV	IV	IV	IV	IV	V	V	V	V	V	V	V	V
Sample number			64	8	39	17	79	15	9	20	83	5	38	18	45	12	11	10	1	58	16	48	73	69	92	4	86	89	56	43	33	40	14	80	42	81	22	60	37	98	44
TCMID code sequencing			TCMID118	TCMID129	TCMID125	TCMID120	TCMID124	TCMID127	TCMID117	TCMID122	TCMID130	TCMID132	TCMID131	TCMID133	TCMID134	TCMID136	TCMID135	TCMID123	TCMID128	TCMID126	TCMID109	TCMID119	TCMID102	TCMID112	TCMID111	TCMID098	TCMID099	TCMID100	TCMID115	TCMID104	TCMID107	TCMID097	TCMID110	TCMID105	TCMID106	TCMID101	TCMID113	TCMID103	TCMID108	TCMID114	TCMID121
Microarray slide ID			sUG03-03-09	sUG03-03-09	sUG03-03-08	sUG03-03-08	sUG03-03-09	sUG03-03-08	sUG03-03-08	sUG03-03-08	sUG03-03-08	sUG03-03-22	sUG03-03-08	sUG03-03-08	sUG03-03-09	sUG03-03-22	sUG03-03-22	sUG03-03-22	sUG03-03-08	sUG03-03-08	sUG03-03-08	sUG03-03-09	sUG03-03-08	sUG03-03-10	sUG03-03-10	sUG03-03-09	sUG03-03-10	sUG03-03-10	sUG03-03-10	sUG03-03-10	sUG03-03-10	sUG03-03-10	sUG03-03-10	sUG03-03-09	sUG03-03-09	sUG03-03-10	sUG03-03-09	sUG03-03-09	sUG03-03-10	sUG03-03-10	sUG03-03-03
	Probe ID	Family Genus Species
	o3149_c1309	Peptostreptococcaceae Incertae Sedis	1	1	1	1	12	2	1	1	1	2	1	1	1	1	1	1	2	1	1	1	1	1	1	1	1	2	1	1	1	1	1	1	1	1	1	1	1	1	1
	o3383_c1543	Lactobacillus oris/antri	1	1	1	1	12	1	7	1	4	1	3	1	1	1	3	1	1	1	1	1	2	1	2	1	1	1	1	1	1	1	1	1	1	1	1	1	1	1	1
	o3647_c573	Firmicutes	18	37	44	67	71	63	53	77	44	63	42	74	11	44	42	78	14	58	78	5	28	3	2	2	16	25	11	40	34	4	6	18	1	8	14	17	4	3	9
	2306_c920	Lactobacillus plantarum/paraplantarum/coryniformis/pentosus	16	10	15	20	47	22	14	22	20	22	18	22	4	15	18	33	3	8	33	1	12	2	1	2	3	6	2	21	12	2	1	8	1	3	6	3	1	1	3
	o3378_c1538	Lactobacillus uncultured	4	4	6	14	17	7	8	13	7	7	5	3	1	6	5	2	1	1	2	1	7	2	1	1	4	6	2	14	6	1	1	4	1	3	4	3	1	1	2
	o3473_c1633	Lactobacillus	3	5	7	19	18	9	12	15	11	9	3	2	1	7	3	1	1	1	1	1	9	1	1	1	2	5	2	22	6	1	1	3	1	2	4	3	1	1	1
	o3377_c1537	Lactobacillus uncultured	3	4	6	14	13	7	8	12	6	7	3	2	1	6	3	1	1	1	1	1	5	1	1	1	1	4	1	18	4	1	1	3	1	2	3	2	1	1	1
	o3372_c1532	Lactobacillus crispatus/kefiranofaciens	1	35	1	1	2	2	1	7	3	2	4	7	2	1	4	15	2	10	15	1	2	1	2	1	1	1	1	1	1	1	1	1	1	1	1	1	1	1	1
	o3371_c1531	Lactobacillus crispatus/kefiranofaciens	1	1	2	1	1	1	1	59	28	1	29	73	11	2	29	119	13	40	119	1	6	1	1	1	1	1	1	1	1	1	1	1	1	1	1	1	1	1	1
	o3652_c651	Lactobacillus crispatus	1	1	1	2	1	1	1	8	4	1	6	13	3	1	6	21	4	12	21	1	2	1	1	1	1	1	1	1	1	1	1	2	1	1	1	1	1	1	1
	o3381_c1541	Lactobacillus species	1	1	1	3	1	1	1	12	3	1	5	7	3	1	5	26	5	22	26	1	1	1	1	1	1	1	1	2	1	1	1	1	1	1	1	1	1	1	1
	04962_c202	Lactobacillus gasseri	1	1	2	13	1	1	1	5	5	1	2	6	1	2	2	6	3	5	6	1	1	1	1	1	1	1	1	5	1	1	1	1	1	1	1	1	1	1	1
	o3335_c1495	Chlamydia trachomatis	1	1	1	1	1	1	1	1	1	1	10	1	1	1	10	1	1	1	1	1	1	1	1	1	1	1	1	1	1	1	2	1	1	1	1	1	1	1	10
	o3322_c1482	Brevundimonas	1	1	2	1	1	1	1	1	1	1	2	2	1	2	2	1	1	1	1	1	1	1	1	1	12	1	1	1	1	1	1	1	1	1	1	1	2	1	1
	o3233_c1393	Paecilomyces/Penicillium	1	1	1	1	1	1	1	1	1	1	1	1	1	1	1	1	1	1	1	1	1	1	1	1	1	1	1	1	1	1	1	1	1	1	1	37	1	1	1
	o3774_c1869	Peptostreptococcaceae Incertae Sedis	1	1	1	1	1	1	1	1	1	1	1	1	1	1	1	1	1	1	1	1	1	77	1	1	1	1	1	1	1	1	1	1	1	1	1	1	1	1	1
	o3384_c1544	Lactobacillus frumenti/oris/antri	1	1	1	1	1	1	1	1	1	1	1	1	1	1	1	1	1	1	1	1	1	2	1	1	1	25	1	1	1	1	1	1	1	1	1	1	1	1	1
	o3483_c1643	Psychrobacter	1	1	1	1	1	1	1	1	1	1	1	1	1	1	1	1	1	1	1	1	1	1	1	1	1	40	1	1	1	1	1	1	1	1	1	1	1	1	1
	o3460_c1620	unclassified Oxalobacteraceae	1	1	1	1	1	1	1	1	1	1	1	1	1	1	1	1	1	1	1	1	1	1	1	1	1	1	1	1	1	1	1	1	1	1	18	1	1	1	1
	o4966_c1273	Serratia marcescens	1	1	1	1	1	1	1	1	1	1	1	1	1	1	1	1	1	1	1	1	1	1	1	1	1	1	1	2	1	1	1	1	1	1	23	1	1	1	1
	o2804_c295	Streptococcus group	13	1	1	1	1	1	1	1	1	1	1	1	1	1	1	1	1	1	1	1	1	1	1	1	1	1	1	1	1	1	2	1	1	1	1	1	1	1	1
	o5617_c2570	Actinomyces naeslundii	12	1	1	1	1	1	1	1	1	1	1	1	1	1	1	1	1	1	1	1	1	1	1	1	1	1	1	1	1	1	1	1	1	1	1	2	1	1	1
	o5598_c2551	Propioniumbacterium acnes	22	2	1	2	1	1	1	1	1	1	1	1	7	1	1	1	1	1	1	2	2	4	9	1	1	1	1	1	1	1	1	3	6	1	1	2	2	1	1
	o5608_c2561	uncultured bacterium Phorphyromonadaceae	16	3	4	8	3	2	3	8	2	2	3	3	6	4	3	5	7	2	5	5	8	6	7	7	7	4	6	8	5	3	4	5	12	8	6	7	4	6	8
	o4953_c1275	e.coli/shigella	38	1	1	10	1	2	1	1	1	2	2	2	20	1	2	4	2	2	4	11	2	30	26	16	2	2	3	2	2	1	1	12	24	34	18	13	13	3	16
	o4951_c1267	e.coli/shigella	31	2	3	26	1	2	1	2	2	2	4	1	9	3	4	6	1	1	6	10	3	26	26	10	4	4	10	7	6	2	5	9	18	17	14	12	9	11	12
	o3660_c890	Buchnera Salmonella/Klebsiella/unclassified enterobacteriaceae	15	1	2	5	1	2	2	2	2	2	1	1	5	2	1	2	1	1	2	4	2	14	18	8	2	3	11	5	5	1	5	5	16	7	6	12	6	8	5
	o3361_c1521	Gardnerella uncultured	9	1	1	1	1	1	1	1	1	1	1	1	1	1	1	1	1	1	1	1	1	1	1	1	1	1	3	1	32	6	63	105	28	1	1	1	1	1	1
	o3437_c1597	Prevotella bivia	1	7	1	1	1	1	1	1	1	1	1	1	1	1	1	1	1	1	1	2	1	1	1	11	22	1	4	40	1	1	1	39	1	1	16	21	2	1	1
	o3438_c1598	Prevotella bivia	1	3	1	1	3	1	1	1	1	1	1	1	1	1	1	1	1	1	1	9	1	1	1	3	12	1	1	11	1	1	1	16	1	1	5	7	1	1	1
	o2751_c234	Prevotella species	1	4	1	1	4	1	1	1	1	1	1	1	1	1	1	1	1	1	1	14	1	1	1	10	24	1	2	13	1	1	1	19	1	1	14	12	1	1	1
	o2750_c233	Prevotella bivia	3	3	2	1	3	1	1	1	1	1	1	1	1	2	1	1	1	1	1	26	1	1	2	17	42	2	4	19	3	1	2	41	1	4	29	18	2	2	5
	o3393_c1553	Porphyromonas uenonis/asaccharolytica	1	1	1	1	1	1	1	1	1	1	1	1	1	1	1	1	1	1	1	65	1	1	1	4	42	1	13	1	1	51	1	1	1	1	2	1	1	1	1
	2334_c941	Prevotella disiens	1	1	1	1	1	1	1	1	1	1	1	1	1	1	1	1	1	1	1	13	1	1	2	4	4	1	1	1	1	1	1	1	1	1	1	1	1	1	1
	o3433_c1593	Prevotella disiens	1	1	1	1	1	1	1	1	1	1	1	1	1	1	1	1	1	1	1	31	1	1	2	3	4	1	2	1	1	1	1	1	1	1	1	1	1	1	1
	o3474_c1634	unclassified Ruminococcaceae	1	1	1	1	1	1	1	1	1	1	1	1	1	1	1	1	1	2	1	17	1	1	2	1	3	1	1	6	4	1	6	1	1	5	1	3	3	2	7
	o2753_c239	Prevotella group 5	2	1	1	1	1	1	1	1	1	1	1	1	1	1	1	1	1	13	1	7	1	1	1	2	2	2	2	4	2	2	4	2	1	1	1	1	2	1	1
	o3374_c1534	Lactobacillus acidophilus/kitasatonis/amylovorus	1	1	1	1	1	1	1	1	1	1	1	1	1	1	1	1	1	1	1	1	1	1	1	1	1	1	1	1	1	1	1	1	1	1	1	1	1	14	1
	o3441_c1601	Prevotella amniotica	2	1	1	1	1	2	1	1	1	2	1	1	1	1	1	1	1	1	1	1	1	1	1	1	1	2	5	6	1	2	17	1	2	1	1	1	1	20	7
	o3618_c403	Bacteroides	57	38	2	3	44	2	1	2	2	2	1	1	1	2	1	2	1	1	2	72	2	2	3	74	139	78	96	127	33	85	103	129	32	36	82	83	96	129	104
	2205_c832	Bacteroides group	61	3	1	1	2	1	1	1	1	1	1	1	1	1	1	1	1	1	1	77	1	2	11	60	105	25	50	72	77	44	99	86	18	93	45	34	53	81	72
	o2754_c241	Prevotella group 7	83	6	1	1	5	1	1	1	1	1	1	1	1	1	1	1	2	1	1	129	1	4	33	78	153	61	95	112	142	75	144	121	53	151	91	66	117	133	101
	o3309_c1469	Atopobium vaginae	6	1	1	1	4	1	2	1	1	1	1	1	1	1	1	1	1	1	1	27	1	20	1	15	22	57	31	93	18	11	120	31	6	73	31	60	21	101	20
	o3068_c1228	Atopobium	4	1	1	1	3	1	1	1	1	1	1	1	2	1	1	1	1	1	1	27	1	21	1	32	17	35	35	118	27	9	108	25	4	97	31	75	22	81	23
	o3310_c1470	Atopobium vaginae	15	1	1	1	8	1	1	1	1	1	1	1	1	1	1	1	1	1	1	52	2	21	2	41	49	74	52	154	45	21	119	58	14	129	67	104	42	140	46
	o4972_c460	Megasphaera	2	1	1	1	1	1	1	1	1	1	1	1	1	1	1	1	1	1	1	8	1	6	1	3	4	8	16	13	17	3	14	8	1	8	5	13	4	26	9
	o3388_c1548	Megasphaera	3	1	1	1	1	1	1	1	1	1	1	1	1	1	1	1	1	1	1	17	1	6	1	4	6	14	23	33	29	4	21	11	2	7	11	17	6	54	14
	o5578_c2531	Gardnerella vaginalis	8	2	5	1	16	1	1	1	1	1	1	1	1	5	1	1	1	1	1	79	56	10	4	29	65	66	16	102	108	3	24	8	3	70	40	71	14	69	42
	o3386_c1546	Gardnerella vaginalis	44	1	64	1	42	1	1	8	9	1	6	3	2	64	6	1	1	1	1	105	147	68	20	48	131	90	57	146	88	49	52	46	1	115	102	102	7	134	121
	o3359_c1519	Gardnerella vaginalis	22	1	47	1	22	1	1	4	5	1	4	3	1	47	4	1	1	1	1	101	166	60	18	34	120	80	54	132	51	23	31	30	1	109	51	79	3	132	74
	o4973_c570	Bifidobacterium group	5	1	2	1	1	1	1	1	1	1	1	1	1	2	1	1	1	1	1	15	25	9	2	8	12	18	9	12	18	2	5	15	4	12	10	14	4	32	12
	o5586_c2539	Actinomyces odontolyticus	5	1	1	1	1	1	1	1	1	1	1	1	2	1	1	1	1	1	1	4	11	2	1	1	5	6	5	6	6	1	3	4	2	6	3	4	3	16	6
	o3429_c1589	Sneathia sanguinegens	1	1	1	1	1	1	1	1	1	1	1	1	1	1	1	1	1	1	1	1	1	1	1	1	1	1	1	6	11	1	4	2	1	7	4	5	4	3	4
	o3430_c1590	Sneathia sanguinegens	1	1	1	1	1	1	1	1	1	1	1	1	1	1	1	1	1	1	1	1	1	1	1	1	1	1	2	10	13	1	7	4	1	9	5	7	5	4	7
	o1468_c665	Sneathia amnionii/sp	11	1	1	1	1	1	1	1	1	1	1	1	1	1	1	1	1	1	1	1	1	1	1	27	14	1	10	29	41	6	25	7	3	26	11	15	38	11	21
	o3455_c1615	Atopobium	2	1	1	1	4	1	1	1	1	1	1	1	1	1	1	1	1	1	1	1	2	8	1	31	27	18	58	70	46	9	51	22	3	44	23	62	53	26	54
	o2645_c83	Bifidobacterium group 2	4	1	1	1	1	1	1	1	1	1	1	1	1	1	1	1	1	1	1	4	2	2	2	2	81	3	19	31	23	2	31	7	17	83	1	2	34	7	58
	o3436_c1596	Prevotella uncultured	6	1	1	1	1	1	1	1	1	1	1	1	1	1	1	1	1	1	1	1	1	1	5	10	14	1	16	29	1	13	9	6	5	44	6	3	1	5	10
	o2747_c230	Lachnospiraceae Incertae Sedis productus	1	1	1	1	1	1	1	2	2	1	1	1	3	1	1	3	1	1	3	7	3	2	1	3	2	1	1	2	1	1	3	1	1	29	2	6	8	2	7
	o3661_c901	Fusobacterium group 2	2	1	1	1	1	1	1	1	1	1	1	1	1	1	1	1	1	1	1	1	1	1	1	1	1	1	3	2	68	44	1	1	1	1	1	1	1	1	21
	o3307_c1467	Actinomyces mulieris	1	1	1	1	1	1	1	1	1	1	2	1	1	1	2	1	1	1	1	1	1	2	1	1	1	1	2	2	32	90	61	1	1	1	1	1	1	1	1
	o3410_c1570	Actinomyces mulieris	1	1	1	1	1	1	1	1	1	1	1	1	1	1	1	1	1	1	1	1	1	1	1	1	1	1	2	3	28	84	43	1	1	1	1	1	1	1	1
	o3411_c1571	Actinomyces mulieris	1	1	1	1	1	1	1	1	1	1	1	1	1	1	1	1	1	1	1	1	1	1	1	1	1	1	1	2	26	65	30	1	1	1	1	1	1	1	1
	o3394_c1554	Porphyromonas gingivalis	1	1	1	1	1	1	1	1	1	1	1	1	1	1	1	1	1	1	1	1	1	1	1	1	1	1	1	1	1	17	1	1	1	1	1	1	1	1	1
	o3435_c1595	Prevotella uncultured	16	1	1	1	3	1	1	1	1	1	2	1	1	1	2	1	1	1	1	64	1	1	20	33	62	1	55	115	6	85	2	1	11	6	24	11	6	6	70
	o3352_c1512	Dialister micraerophilus	4	1	1	1	3	1	1	1	2	1	1	1	1	1	1	1	1	2	1	13	5	1	1	6	4	2	7	16	4	7	6	6	2	8	2	2	4	7	6
	o5613_c2566	Buttiauxella/Erwinia/Pantoea izardii/persicina/agglomerans	1	1	1	1	1	1	1	1	1	1	1	1	1	1	1	1	1	1	1	1	1	1	1	1	1	1	1	14	1	1	2	1	1	1	1	1	1	1	1
	o3469_c1629	unclassified Lachnospiraceae	1	1	1	1	1	1	1	1	33	1	1	1	1	1	1	1	1	1	1	1	1	1	1	1	1	9	15	27	11	12	14	1	1	1	1	1	1	1	1
	o5606_c2559	Phylobacterium/Aurantimonas catacumbae/myrsinacearum/ifriqiyense/altamirensis	1	1	1	1	1	1	1	1	1	1	1	1	2	1	1	1	1	1	1	1	1	1	1	1	1	23	14	33	16	10	24	1	1	1	1	1	1	1	1
	o3470_c1630	unclassified Lachnospiraceae	2	1	1	1	1	1	1	2	1	1	1	1	1	1	1	1	1	1	1	2	1	2	1	1	1	31	63	99	31	48	36	1	1	1	1	1	1	1	1
	o1925_c510	Bulleidia	10	2	6	8	9	10	6	6	5	10	3	2	3	6	3	4	2	3	4	4	4	4	2	6	5	11	33	34	25	30	30	3	5	7	3	6	9	4	4
	o4969_c527	Lachnospiraceae Incertae Sedis	6	1	1	1	1	1	1	1	1	1	2	1	1	1	2	1	1	1	1	2	1	6	1	1	20	153	162	119	177	181	166	7	1	1	1	1	10	1	2
	o3387_c1547	unclassified Lachnospiraceae	1	1	1	1	1	1	1	1	1	1	1	1	1	1	1	1	1	1	1	2	4	1	1	2	2	15	24	40	14	19	16	1	1	2	2	2	33	2	2
	o3360_c1520	Gardnerella vaginalis	4	1	1	1	1	1	1	1	1	1	2	1	1	1	2	1	1	1	1	3	4	1	1	1	2	2	26	10	11	8	15	4	1	4	1	12	27	2	2
	o3636_c495	Streptococcus group	42	13	14	18	22	19	14	15	12	19	15	15	9	14	15	18	7	10	18	42	27	9	11	8	39	29	76	47	47	59	51	11	6	24	8	21	19	16	18
	2202_c830	Bacteroides group	5	1	1	1	1	1	1	1	1	1	1	1	1	1	1	1	1	1	1	8	1	1	1	4	6	3	8	10	10	17	16	6	2	10	4	2	5	10	5
	2183_c813	Acidovorax facilis	2	1	1	1	1	1	1	1	1	1	1	1	1	1	1	1	1	1	1	4	1	2	1	2	2	2	4	10	3	3	24	2	1	2	1	1	2	1	2
	o5610_c2563	Peptoniphilus sp	1	1	1	1	1	1	1	1	1	1	1	1	1	1	1	1	2	1	1	3	1	1	2	1	2	1	14	3	1	2	1	1	1	1	1	1	1	1	1
