# Supplementary material for: Molecular assessment of bacterial vaginosis by Lactobacillus abundance and species diversity
Source: Springer Nature journal article supplement (doi:10.1186/s12879-016-1513-3), 2016-04-23
Supplement: MOESM3 [file 10045514]

Table S1. Country of origin of 20 women with bacterial vaginosis and 20 women without bacterial vaginosis.

|                        | BV negative<br>women<br><br>n = 20 | BV positive<br>women<br><br>n = 20 | Total          |
|------------------------|------------------------------------|------------------------------------|----------------|
| <b>Europe</b>          |                                    |                                    |                |
| Netherlands            | 13 (32.5%)                         | 7 (17.5%)                          | 20 women (50%) |
| France                 | 1 (2.5%)                           |                                    | 1 woman (2.5%) |
| Germany                | 1 (2.5%)                           |                                    | 1 woman (2.5%) |
| Great Britain          | 1 (2.5%)                           |                                    | 1 woman (2.5%) |
| Turkey                 | 1 (2.5%)                           |                                    | 1 woman (2.5%) |
| <b>South America</b>   |                                    |                                    |                |
| Suriname               | 1 (2.5%)                           | 9 (22.5%)                          | 10 women (25%) |
| Guyana                 |                                    | 1 (2.5%)                           | 1 woman (2.5%) |
| Colombia               |                                    | 1 (2.5%)                           | 1 woman (2.5%) |
| Dutch Antilles         | 1 (2.5%)                           |                                    | 1 woman (2.5%) |
| <b>Other countries</b> |                                    |                                    |                |
| Indonesia              |                                    | 2 (5%)                             | 2 women (5%)   |
| China                  | 1 (2.5%)                           |                                    | 1 woman (2.5%) |
